# Supplementary material for: A Comparison of Tools That Identify Tumor Cells by Inferring CNVs from Single-Cell Experiments in Pancreatic Ductal Adenocarcinoma
Source: Preprints.org preprint supplement (doi:10.20944/preprints202407.2037.v1), 2024-07-25
Supplement: Supplementary file 1 [file supplementary]

**Supplementary Figure S1:** The identified PDAC tumor cell clusters using marker-based methods for each sample **(a)** Clusters 2 and 6 in PDAC\_1 **(b)** Clusters 0, 1, 3, 5 and 6 in PDAC\_2 **(c)** Clusters 0, 1 and 3 in PDAC\_3 **(d)** Clusters 0, 1, 2, 3 and 4 in PDAC\_4 (Met) **(e)** Clusters 0, 1, 2, 3 and 5 in PDAC\_5 (Met) **(f)** Clusters 4 in AdjNorm\_1 **(g)** Cluster 10 in AdjNorm\_2 **(h)** No clusters in Normal\_N1.

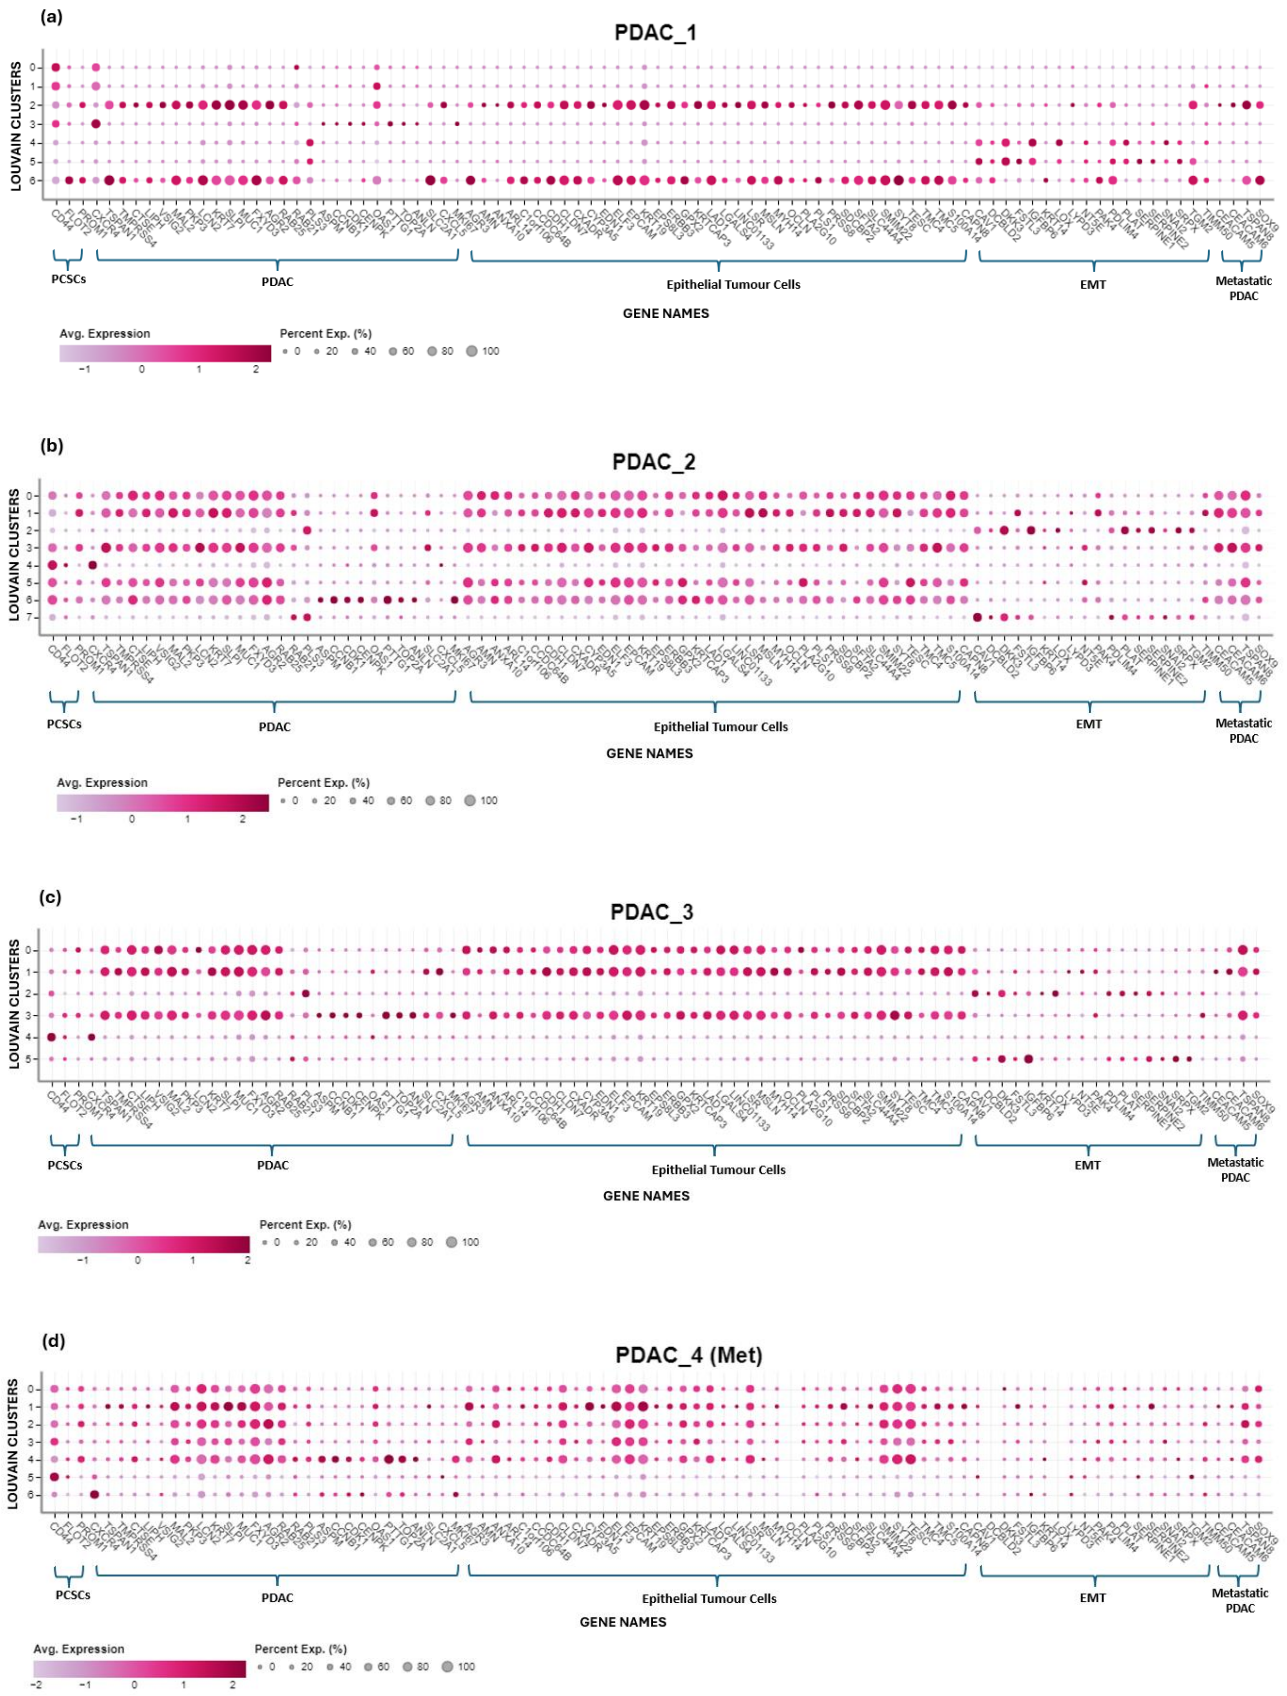

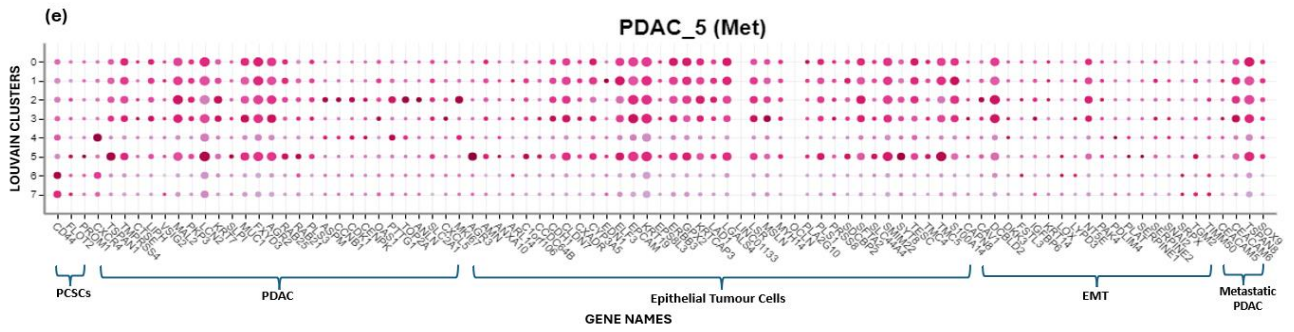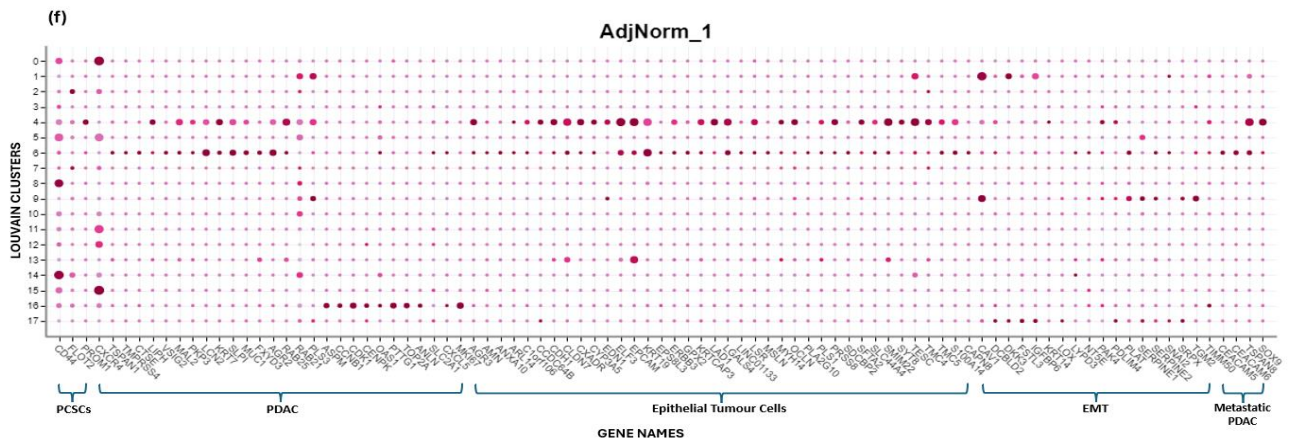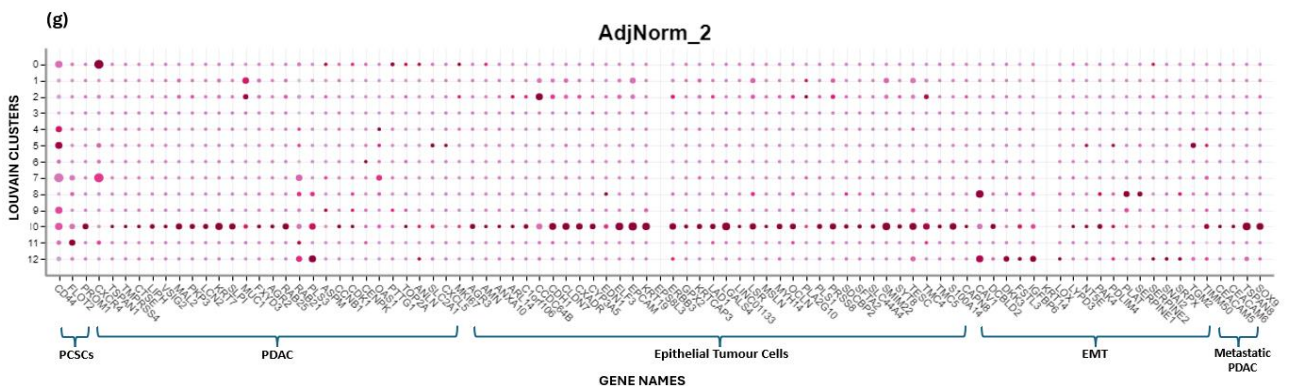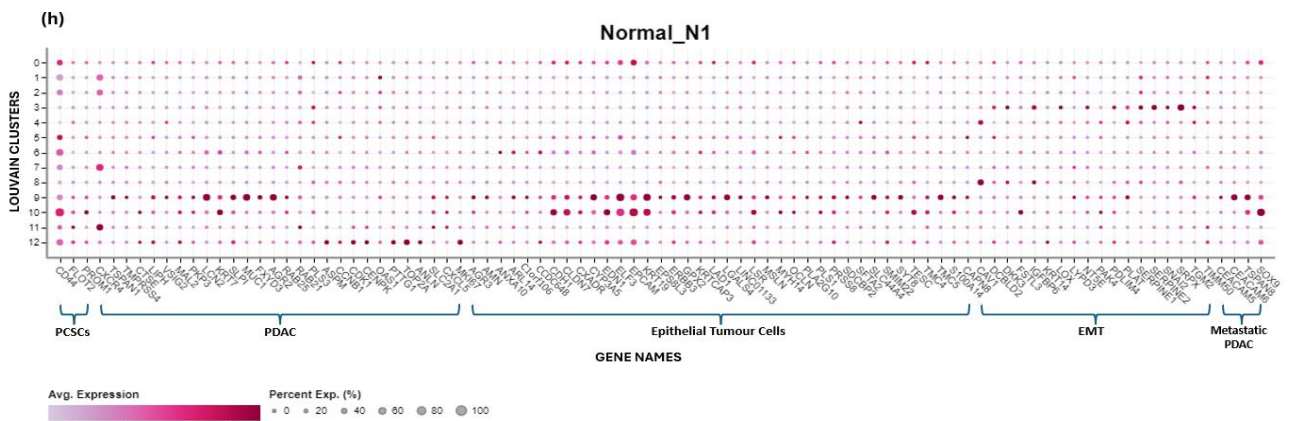



**Supplementary Figure S2:** InferCNV’s heatmap visualization of the CNV profiles of the primary PDAC tumor samples (a-c), metastatic PDAC tumor samples (d-e), and the control samples (f-h). The chromosomes are indicated on the x-axis, while the distinct clusters are represented on the y-axis. The top heatmaps represents the immune cells within the dataset, which were selected as the reference cells. The bottom heatmaps correspond to all the other cell types including the malignant cells, indicating the presence of distinct clonal populations characterized by shared or distinct CNVs among the different clusters. Chromosome regions displaying red color (indicating high expression) are likely amplified in these malignant cells compared to normal cells, whereas those with blue color (indicating low expression) are lost. In contrast, the "normal" cells do not show these significant variations as their genome is still diploid although with minimum structural changes.

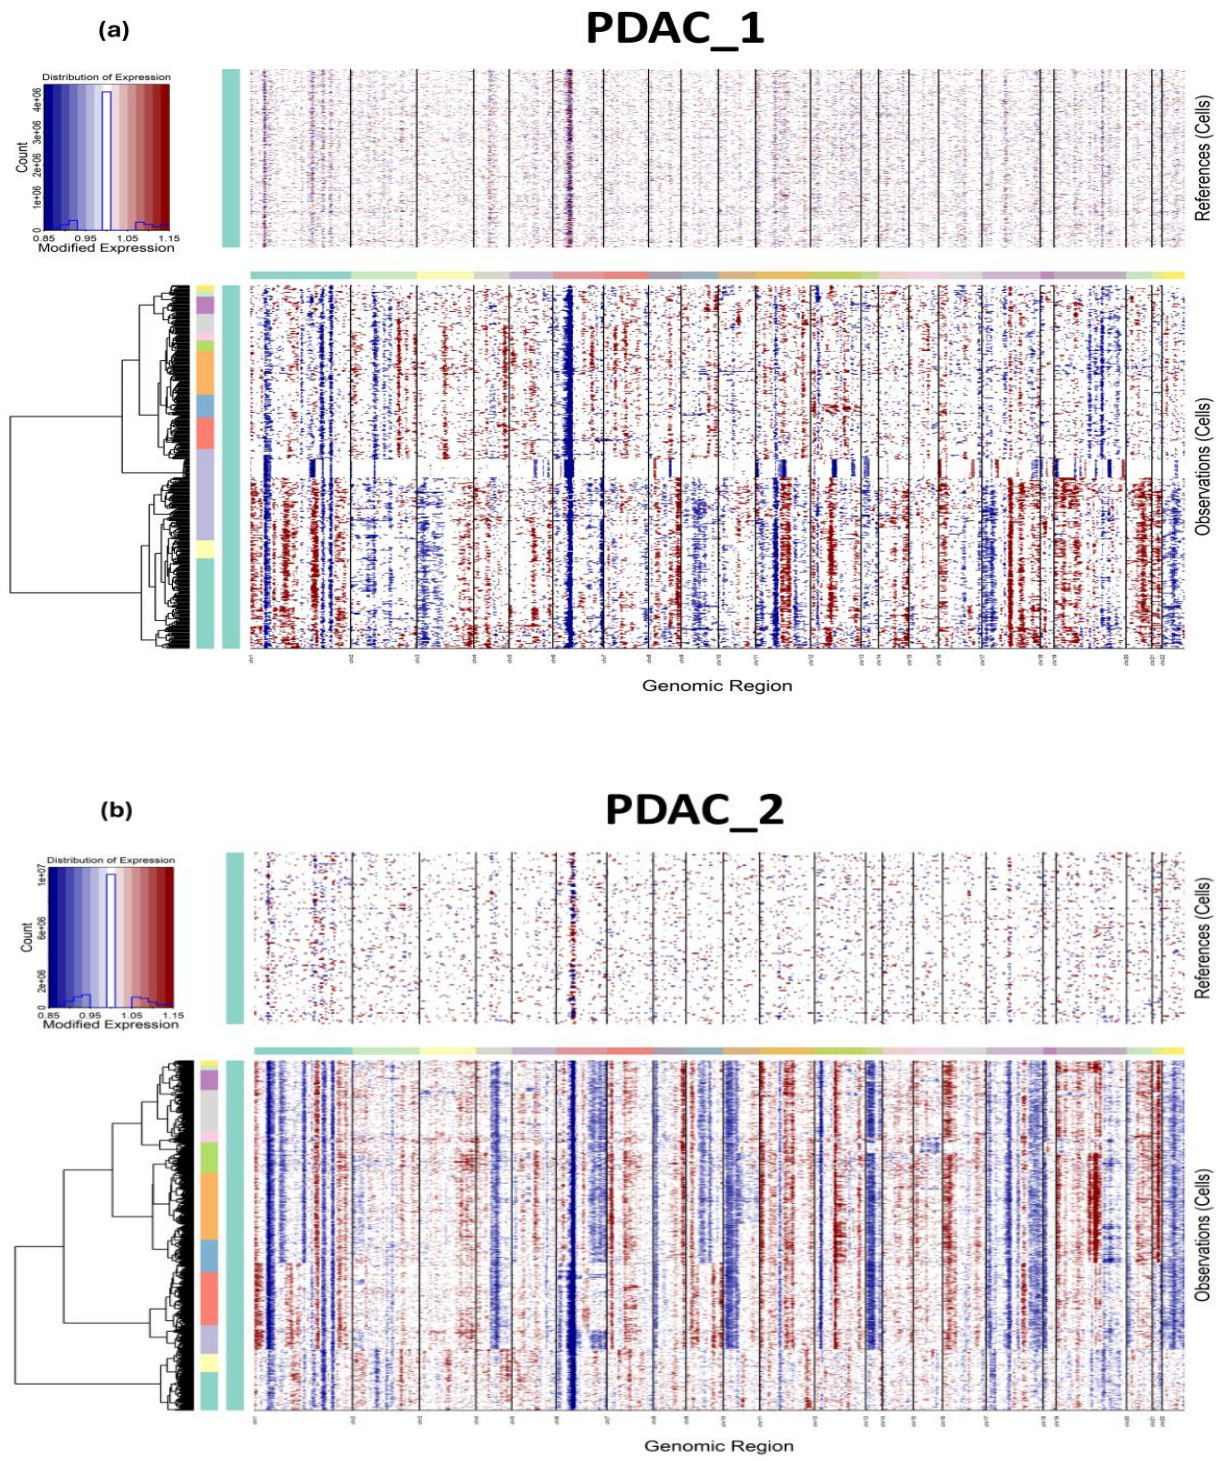



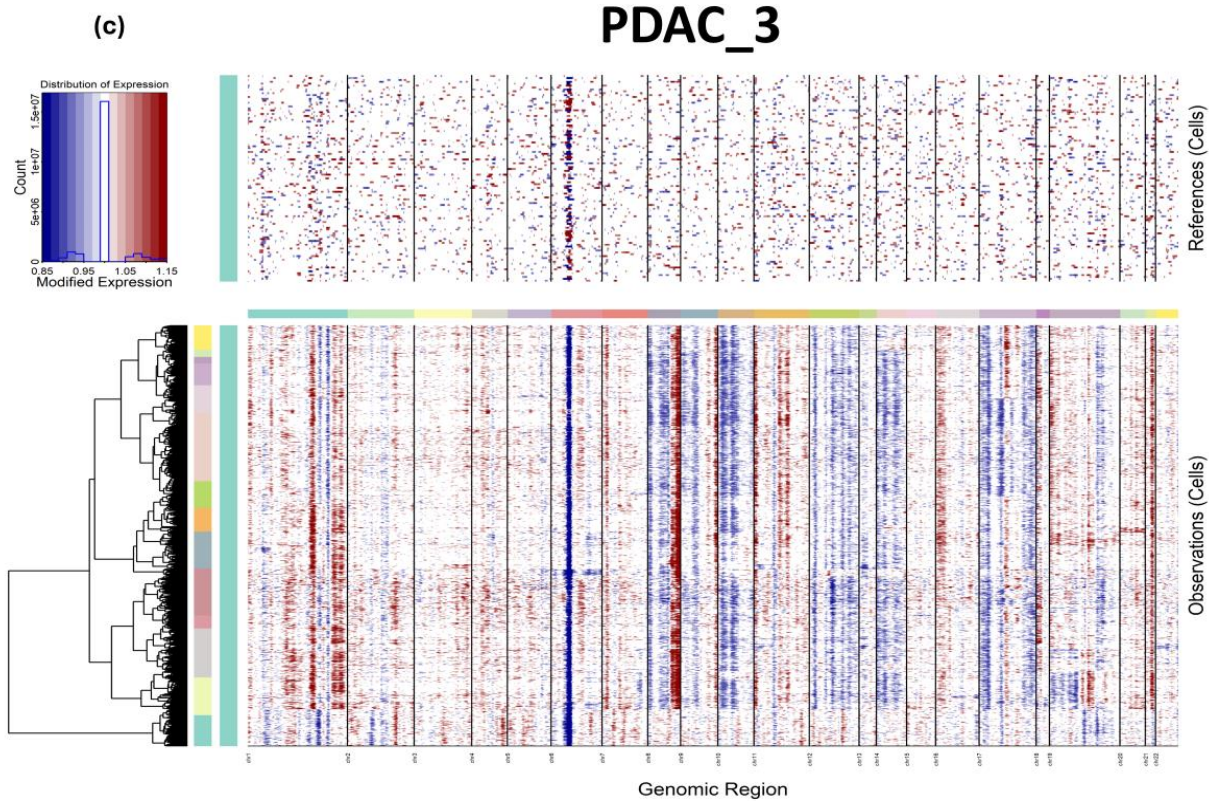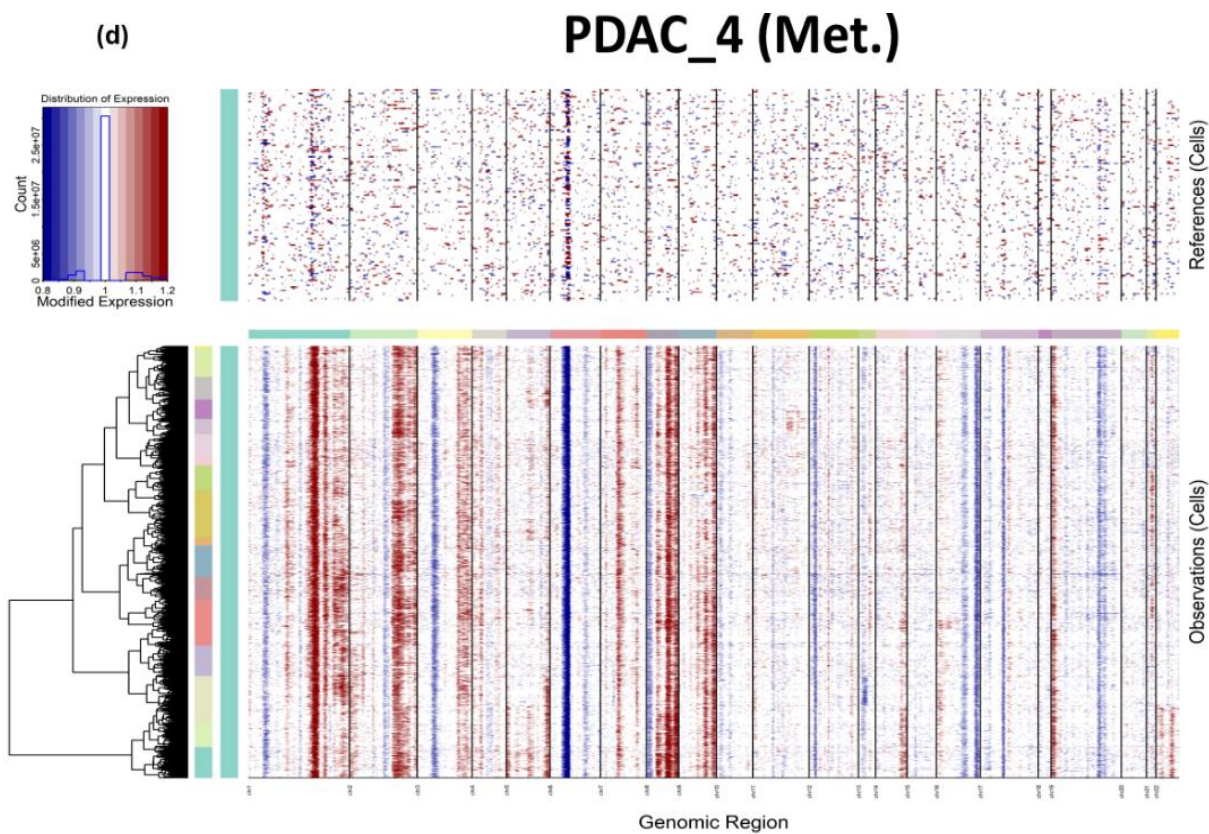



(e)

## PDAC\_5 (Met.)

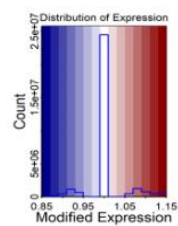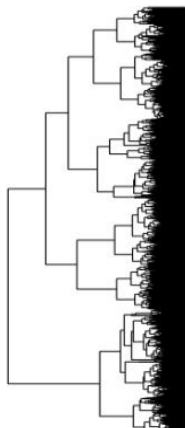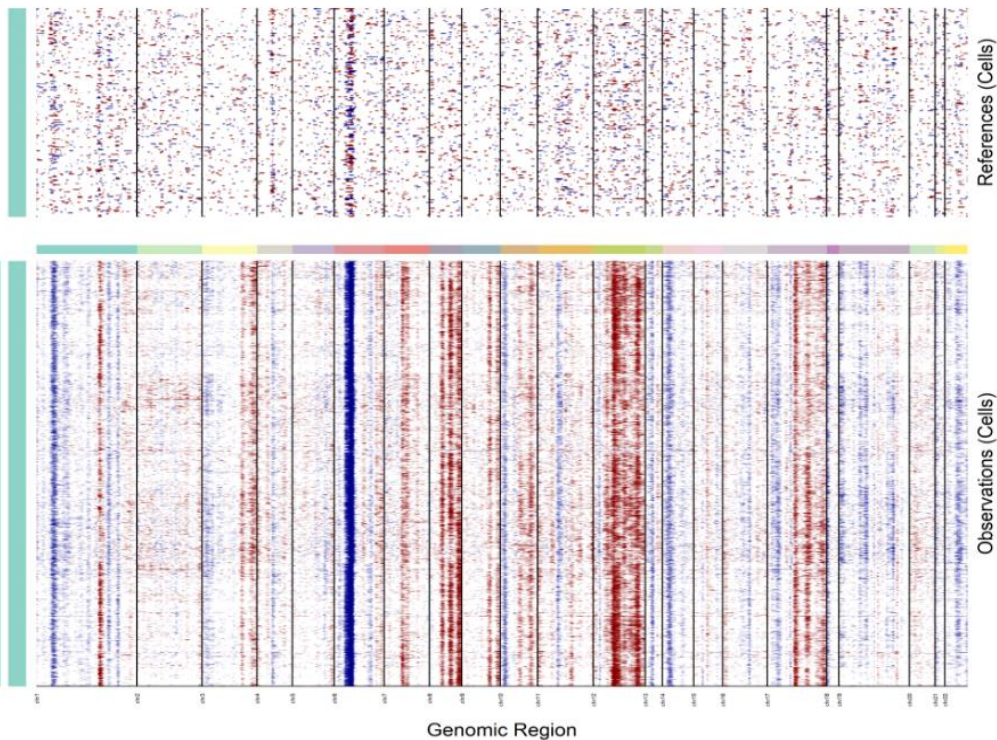

(f)

## AdjNorm\_1

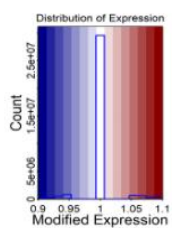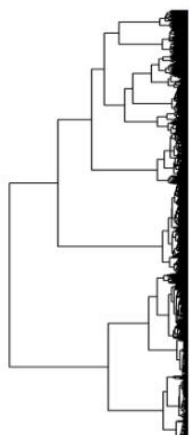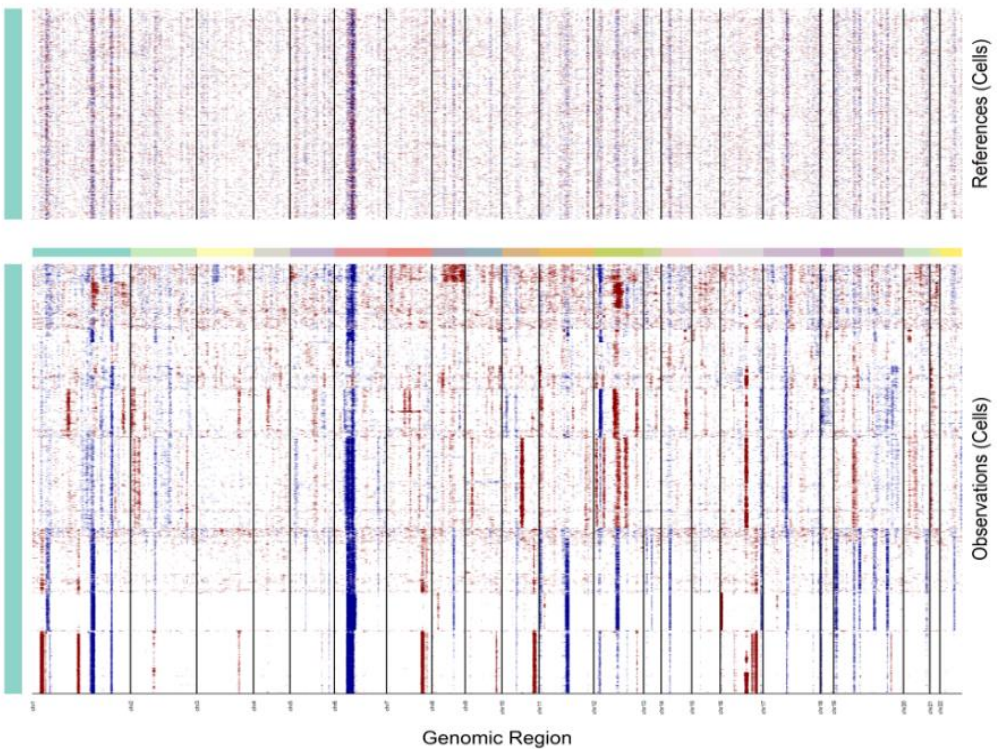



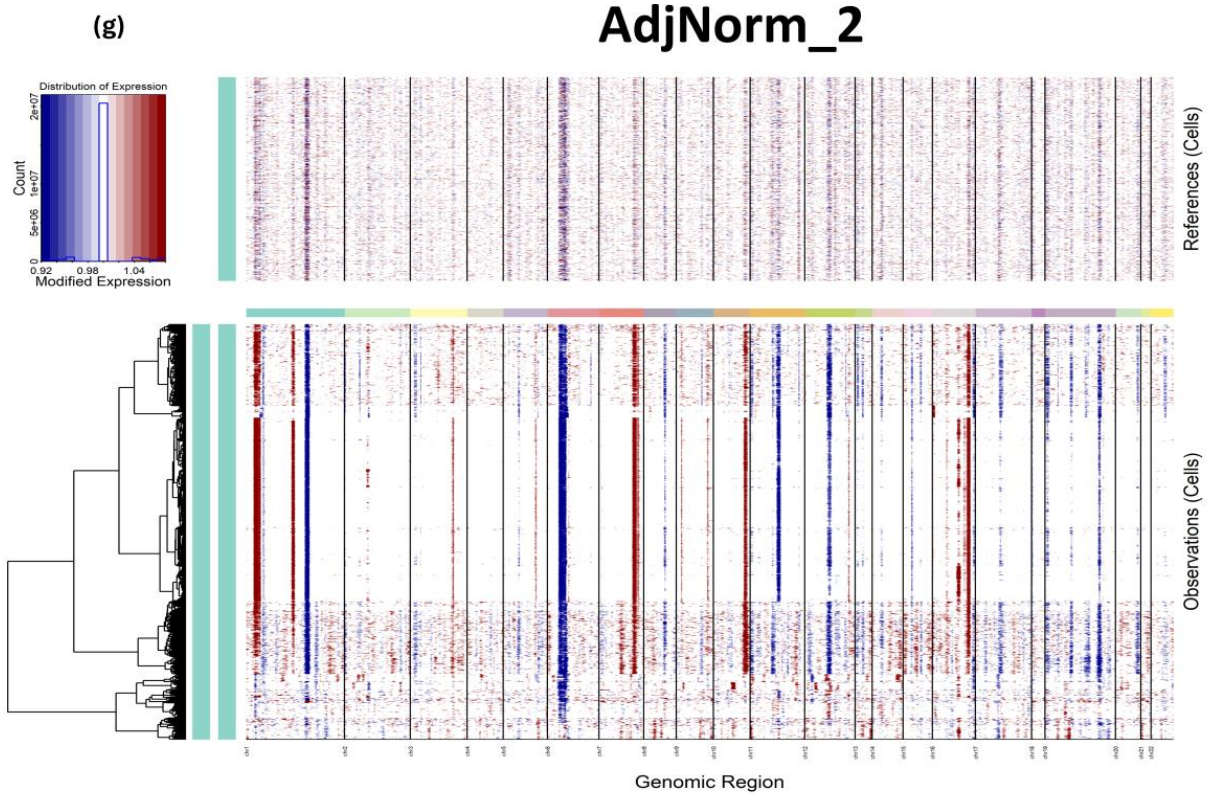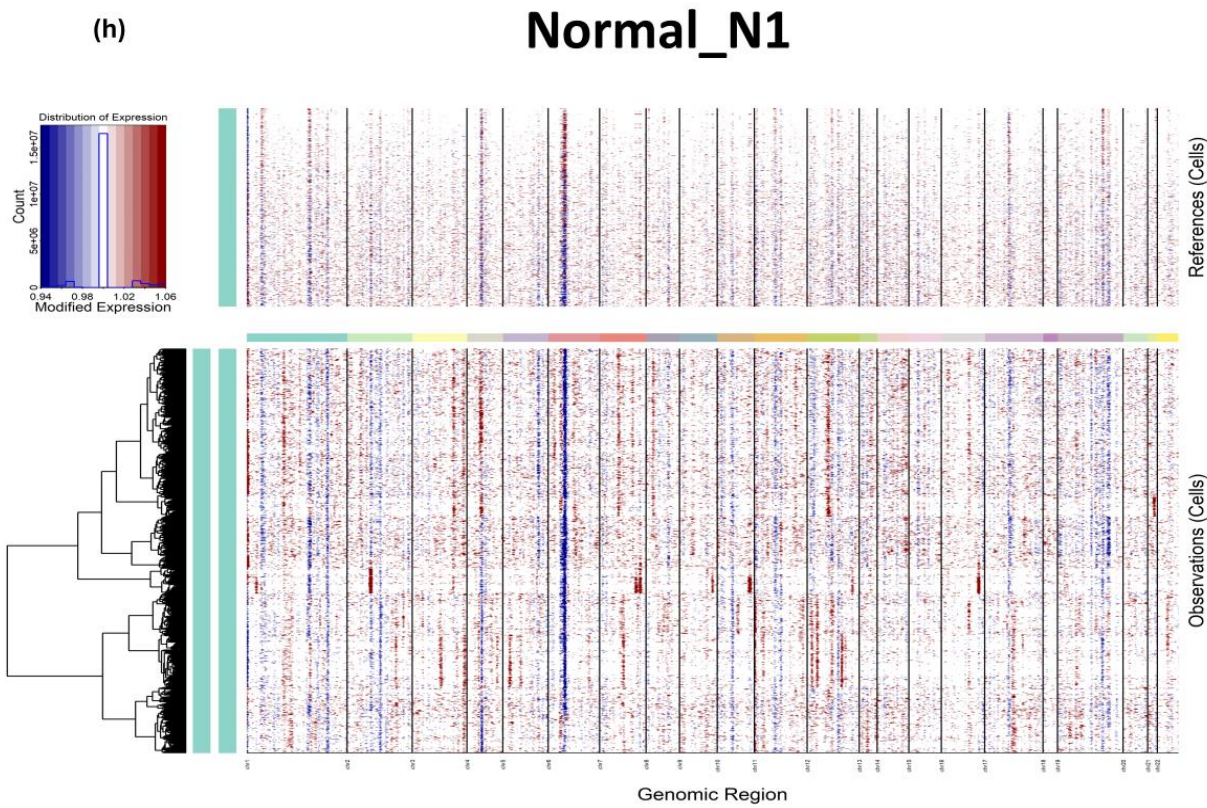

**Supplementary Figure S3:** CopyKAT's heatmap visualization of the CNV profiles of the primary PDAC tumor samples (a-c), metastatic PDAC tumor samples (d-e), and the control samples (f-h). The chromosomes are displayed on the x-axis while the distinct clusters are displayed on the y-axis. The X-chromosome is displayed as chr 23, while the Y-chromosome is not processed by tool. In comparison to normal cells, the chromosomes displayed in orange colour are likely amplified and highly expressed, whereas those with blue colour are deleted and lowly expressed. The predicted aneuploid cells had more amplification and deletion events in comparison to the predicted diploid cells.

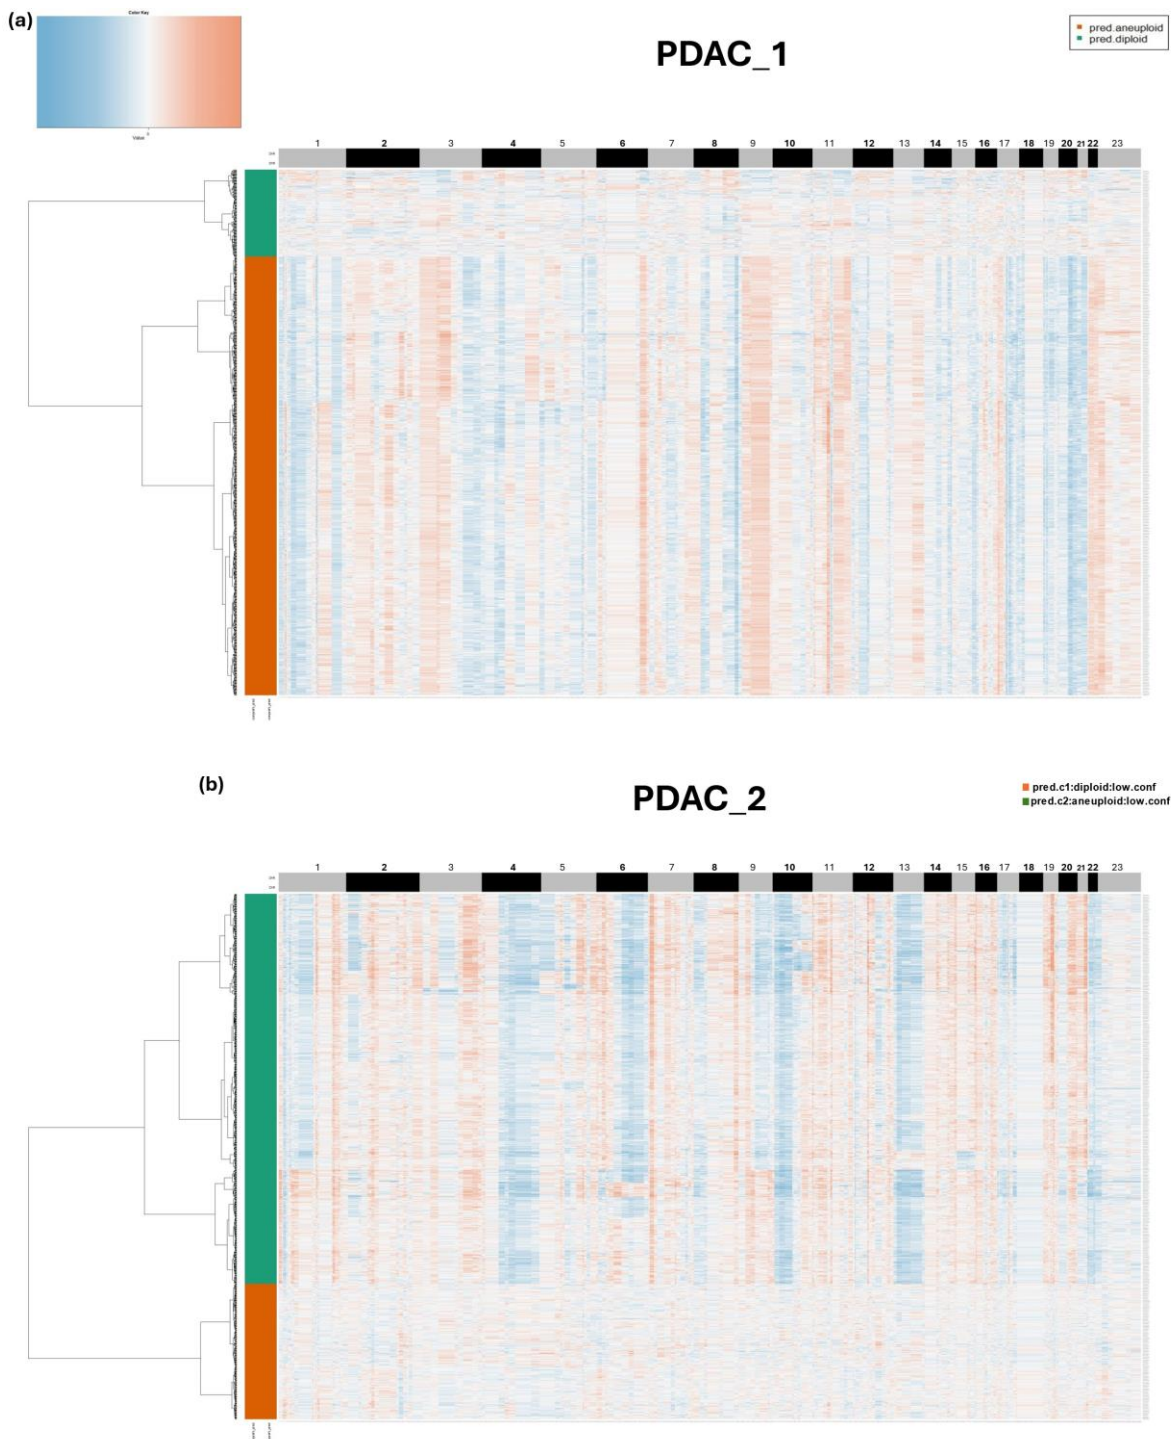



(c)

PDAC\_3

pred. aneuploid  
pred. diploid

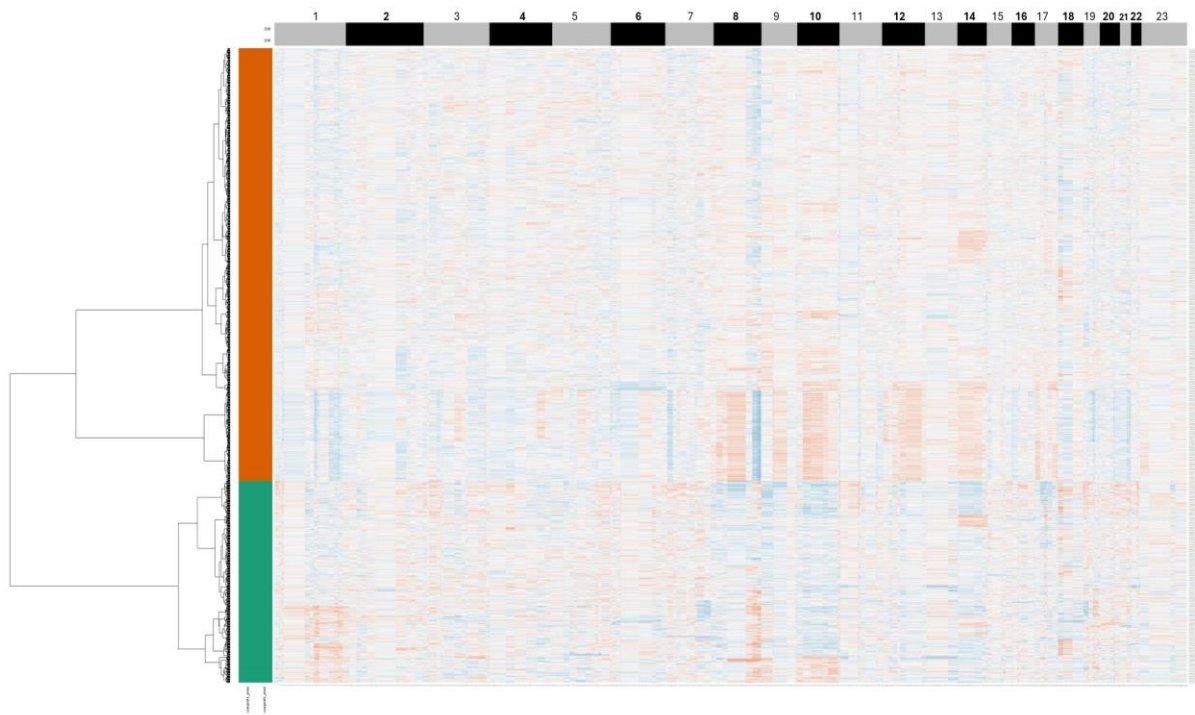

(e)

PDAC\_4 (Met)

pred. aneuploid  
pred. diploid

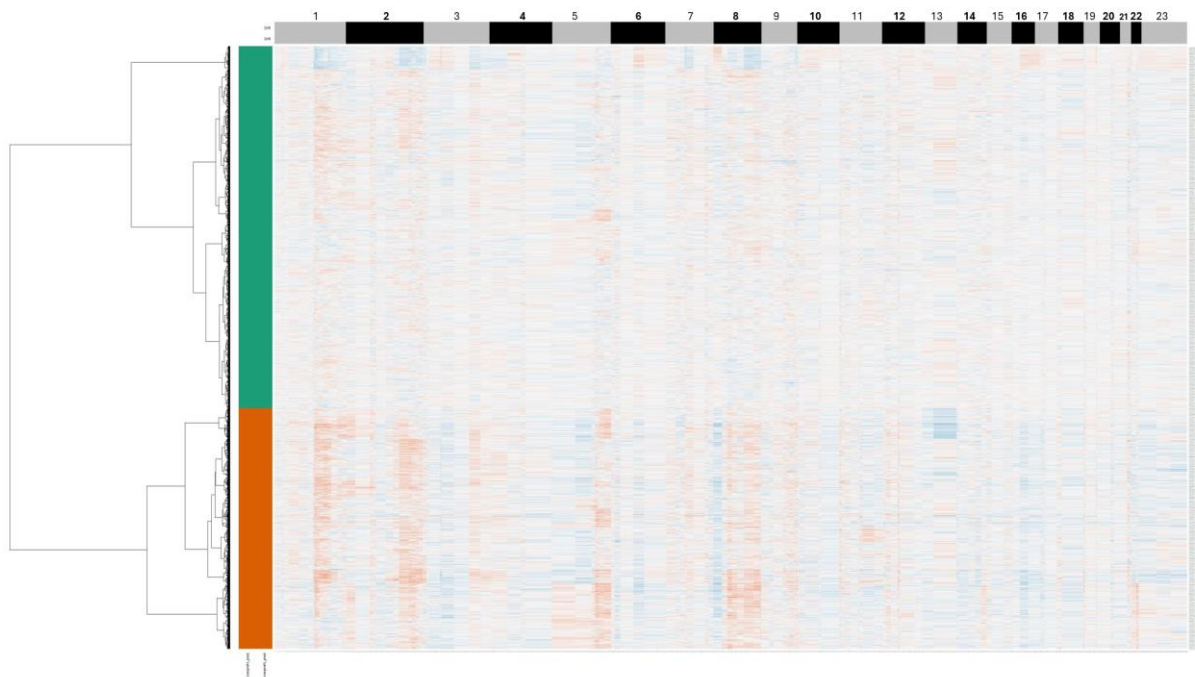



(d)

## PDAC\_5 (Met)

pred.aneuploid  
pred.diploid

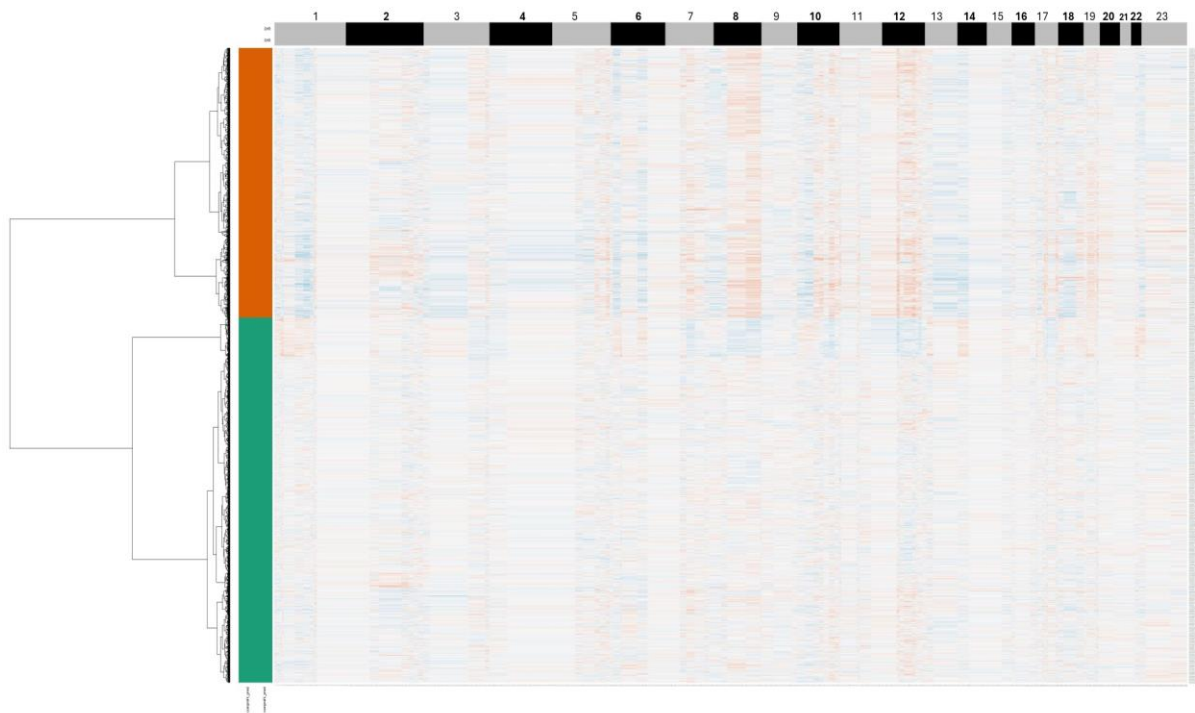

(f)

## AdjNorm\_1

pred.aneuploid  
pred.diploid

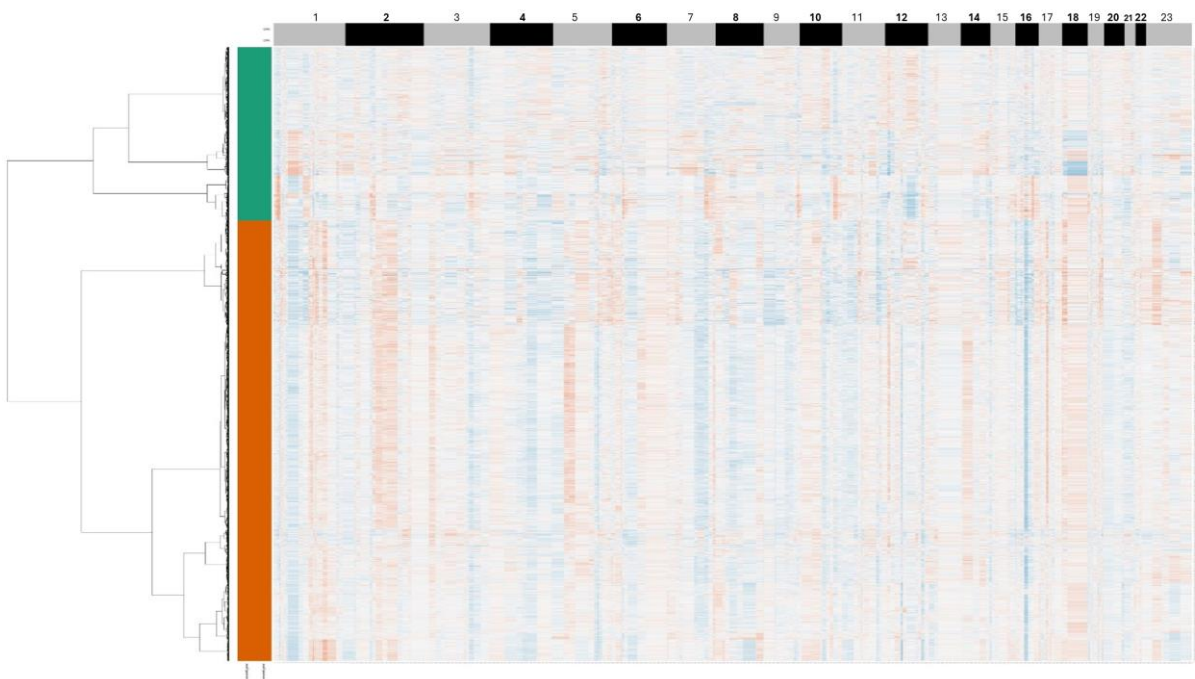

(g)

AdjNorm\_2

pred.aneuploid  
pred.diploid

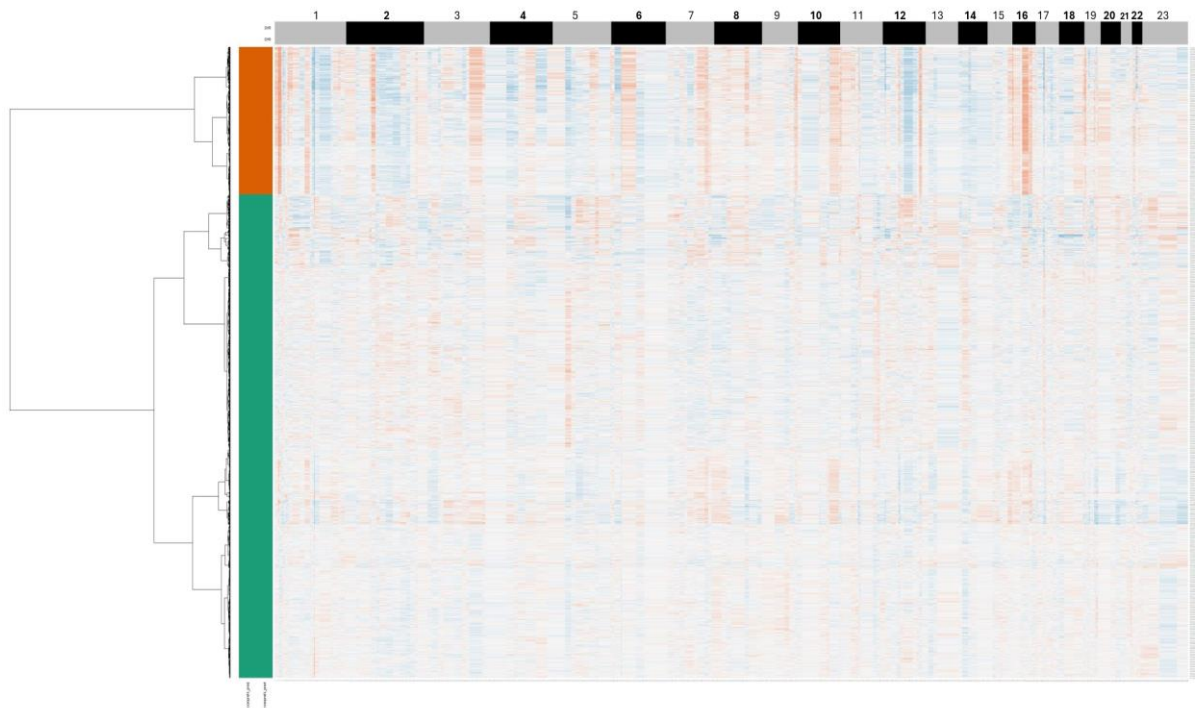

(h)

Normal\_N1

pred.aneuploid  
pred.diploid

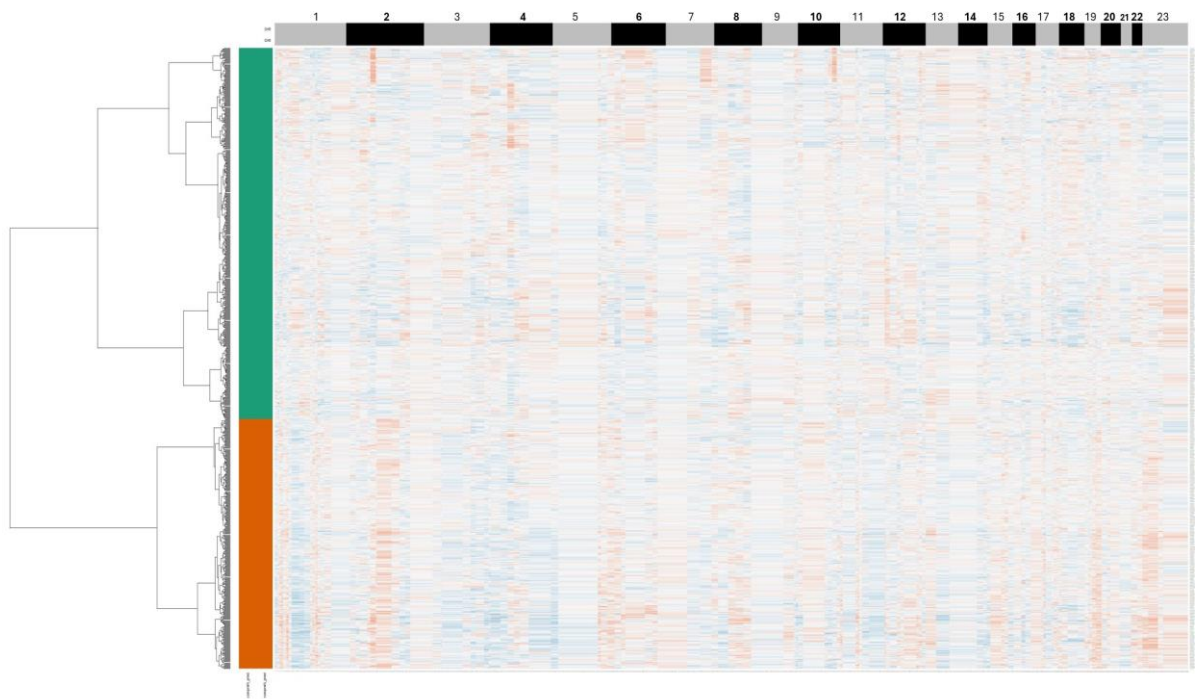



**Supplementary Figure S4:** SCEVAN's heatmap visualization of the predictions and subclones of the predicted tumor cells in the primary PDAC (a-c), metastatic PDAC (d-e), and the control samples(f-h). For each sample, the heatmaps in the second column (ii) are derived from a further clusterization of the tumor cells (orange cluster) identified in the respective heatmaps on the left (i). The chromosomes are indicated on the x-axis, while the distinct clusters are represented on the y-axis. The x-axis represents the individual chromosomes while the tumor status is indicated on the y-axis. The chromosomes displayed in orange colour are likely amplified and therefore highly expressed when compared to the normal cells, whereas those with blue colour are lowly expressed due to deletions. The predicted tumor cells had more deletion and amplification events in comparison to the predicted normal cells.

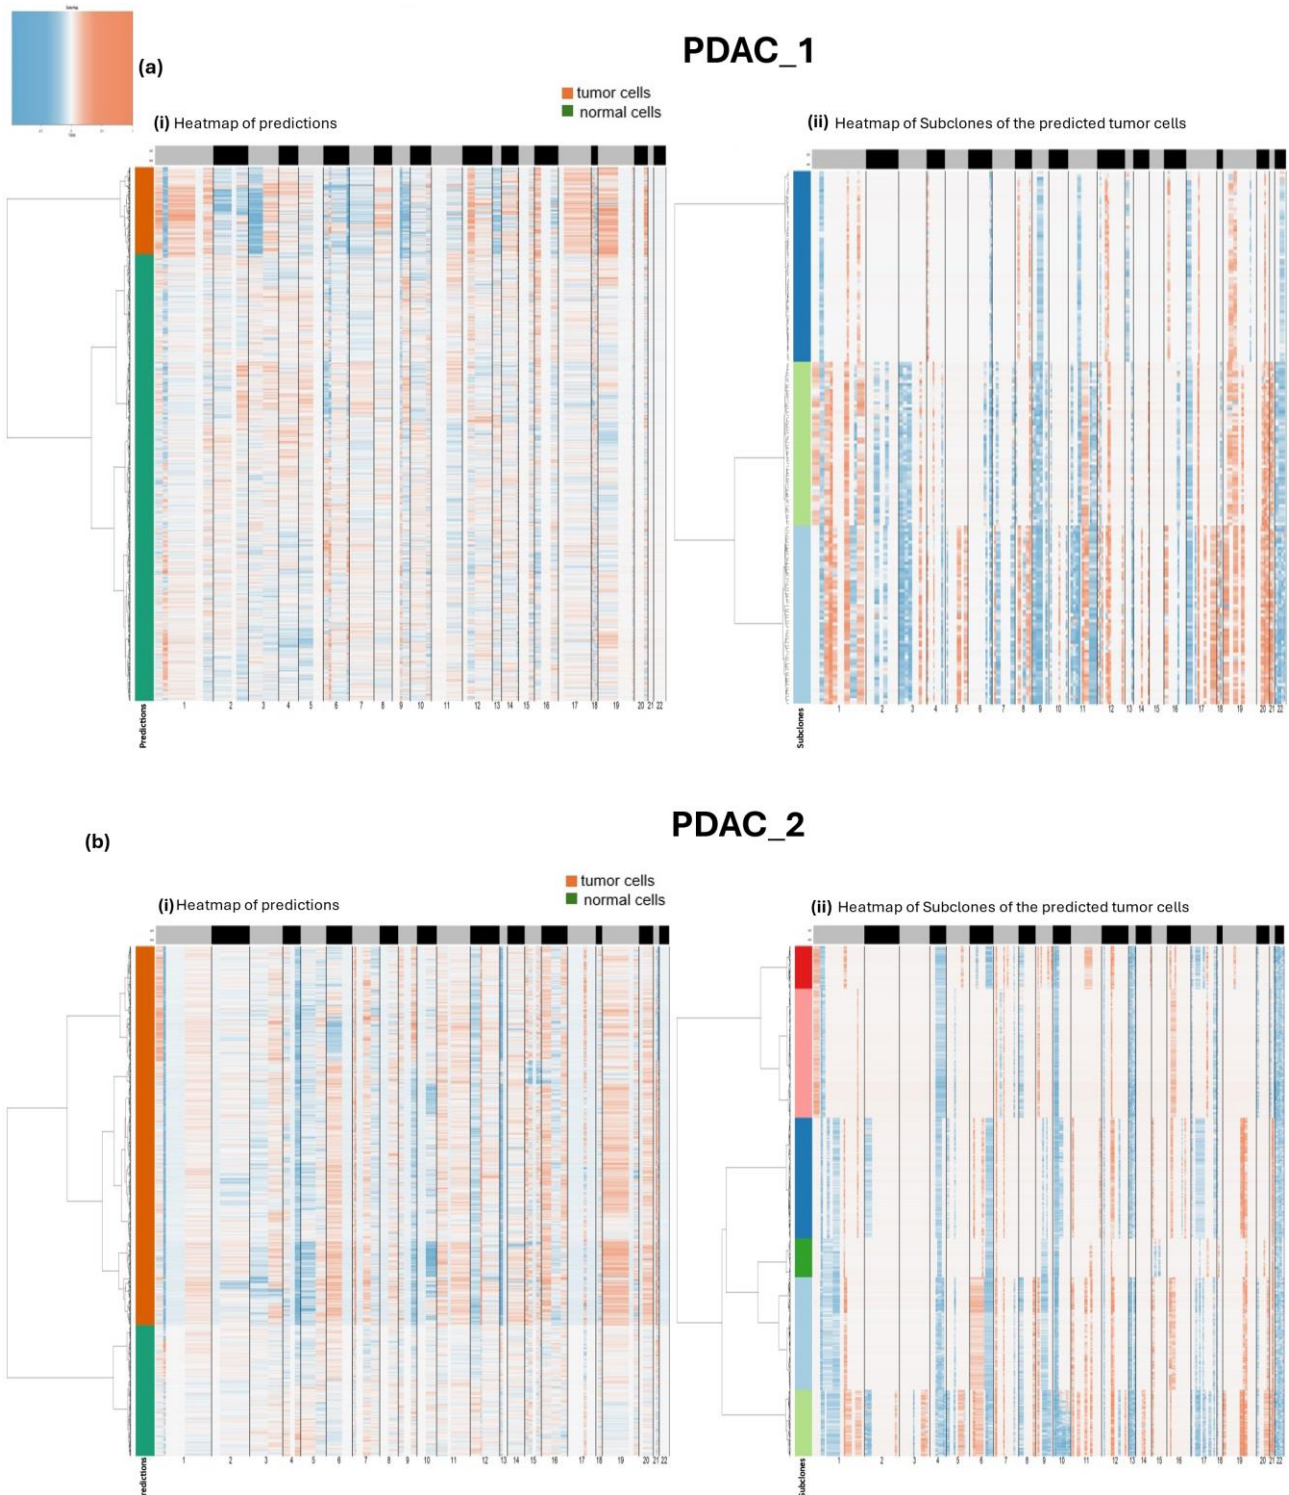

## PDAC\_3

(c)

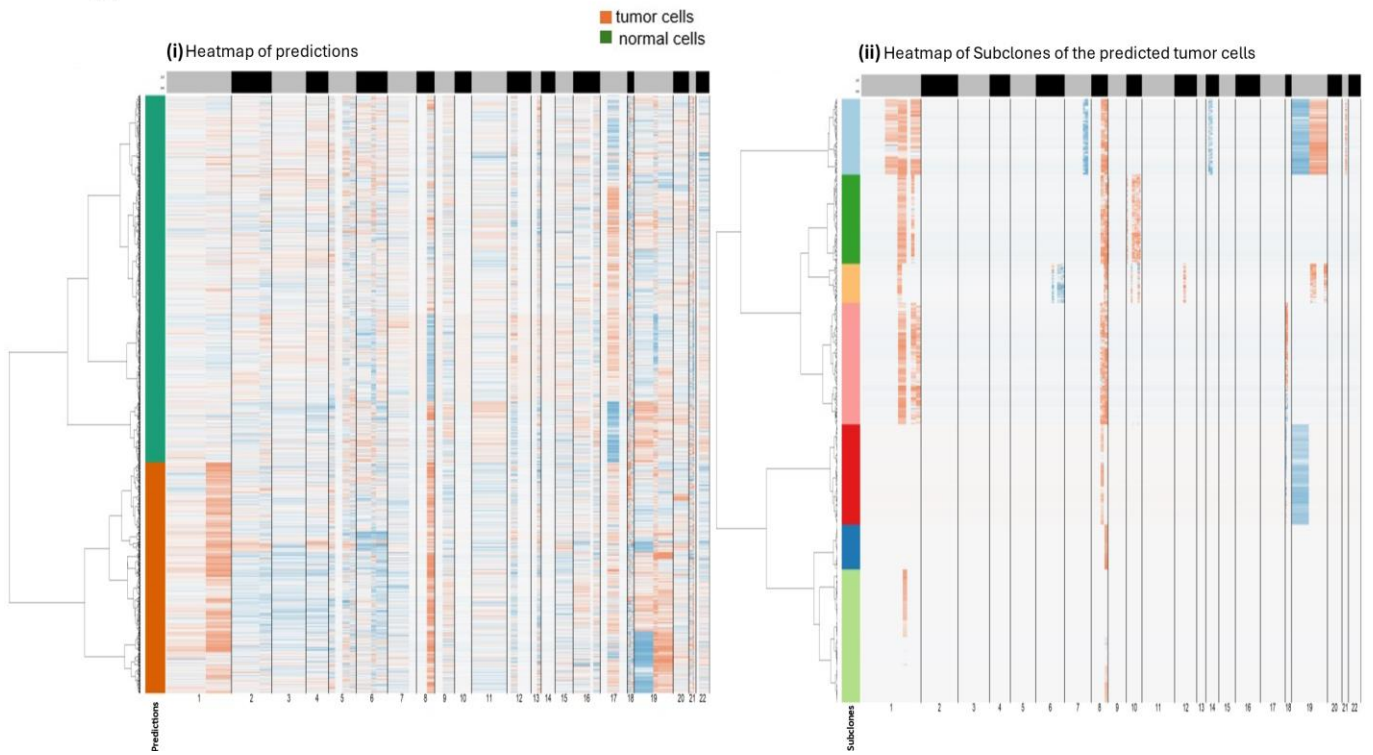

## PDAC\_4 (Met)

(d)

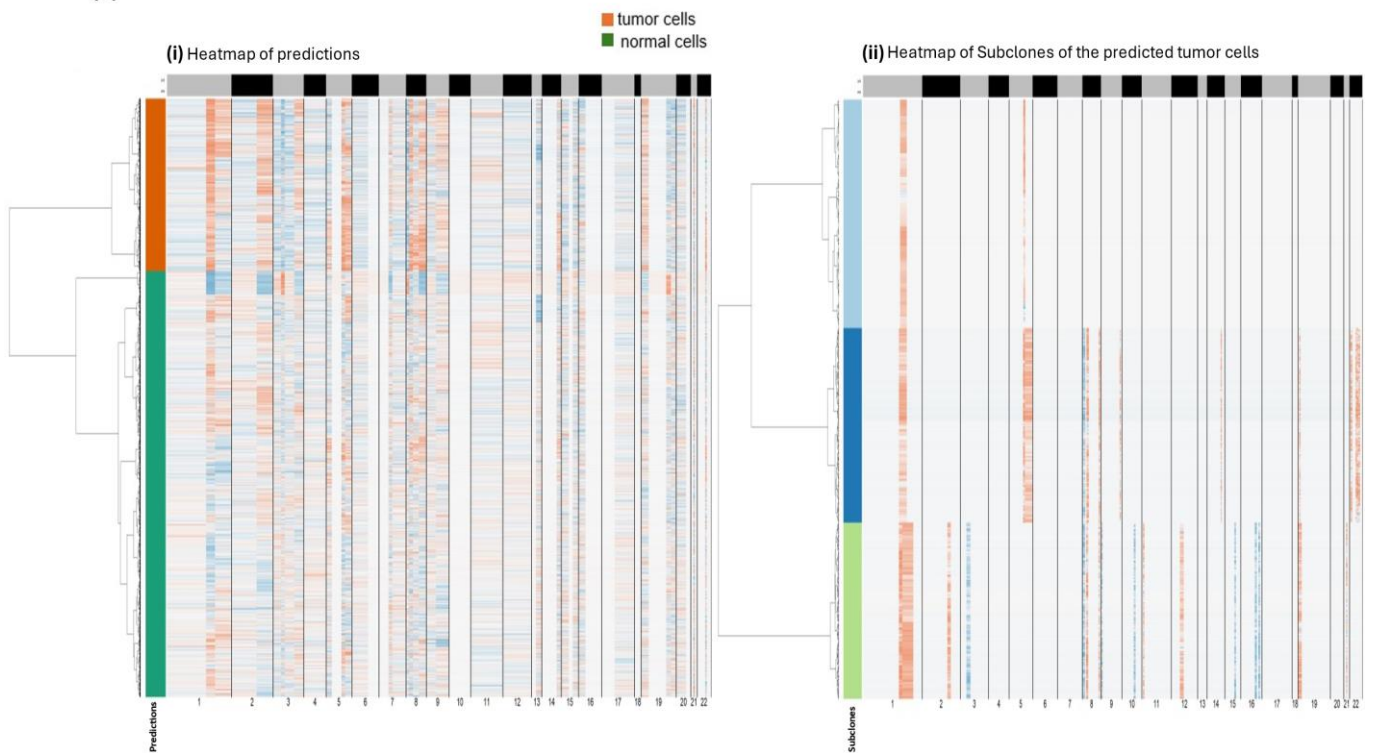



## PDAC\_5 (Met)

(e)

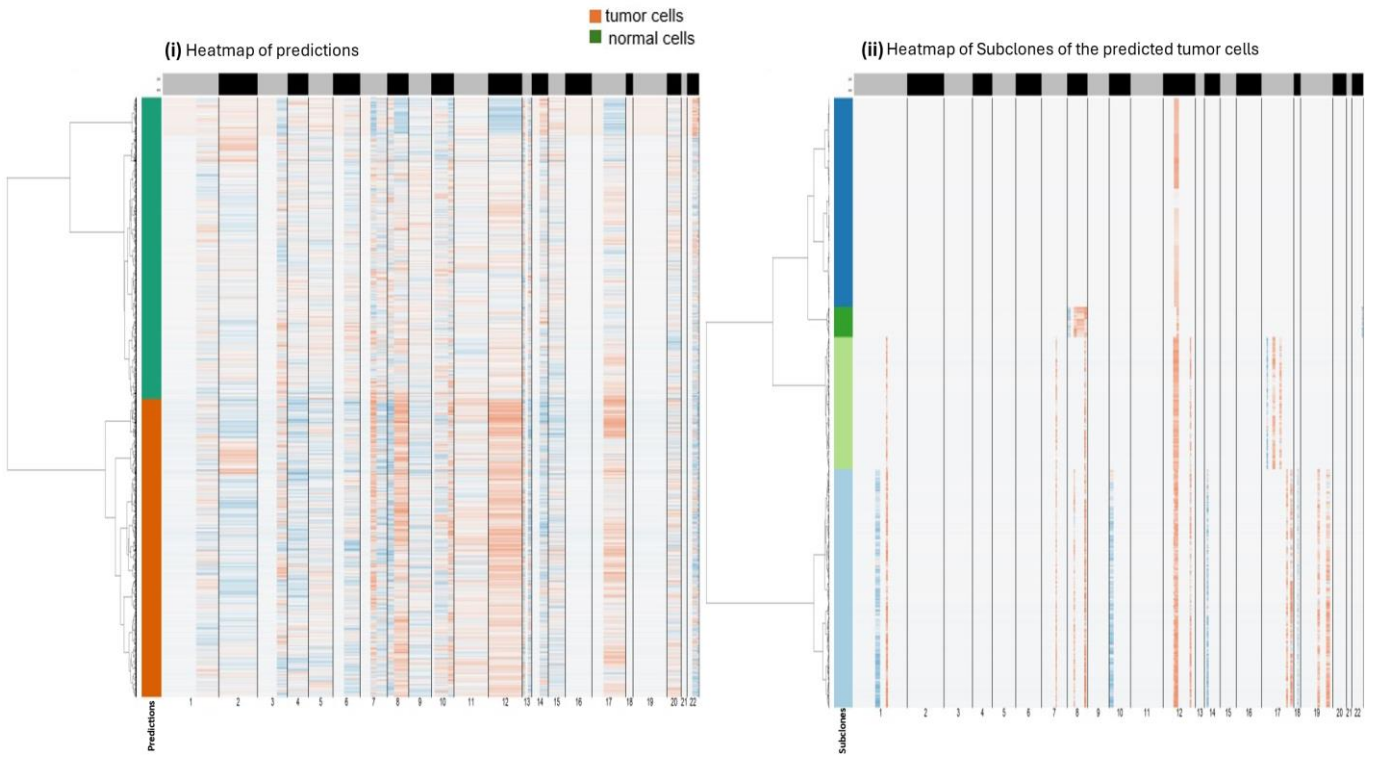

## AdjNorm\_1

(f)

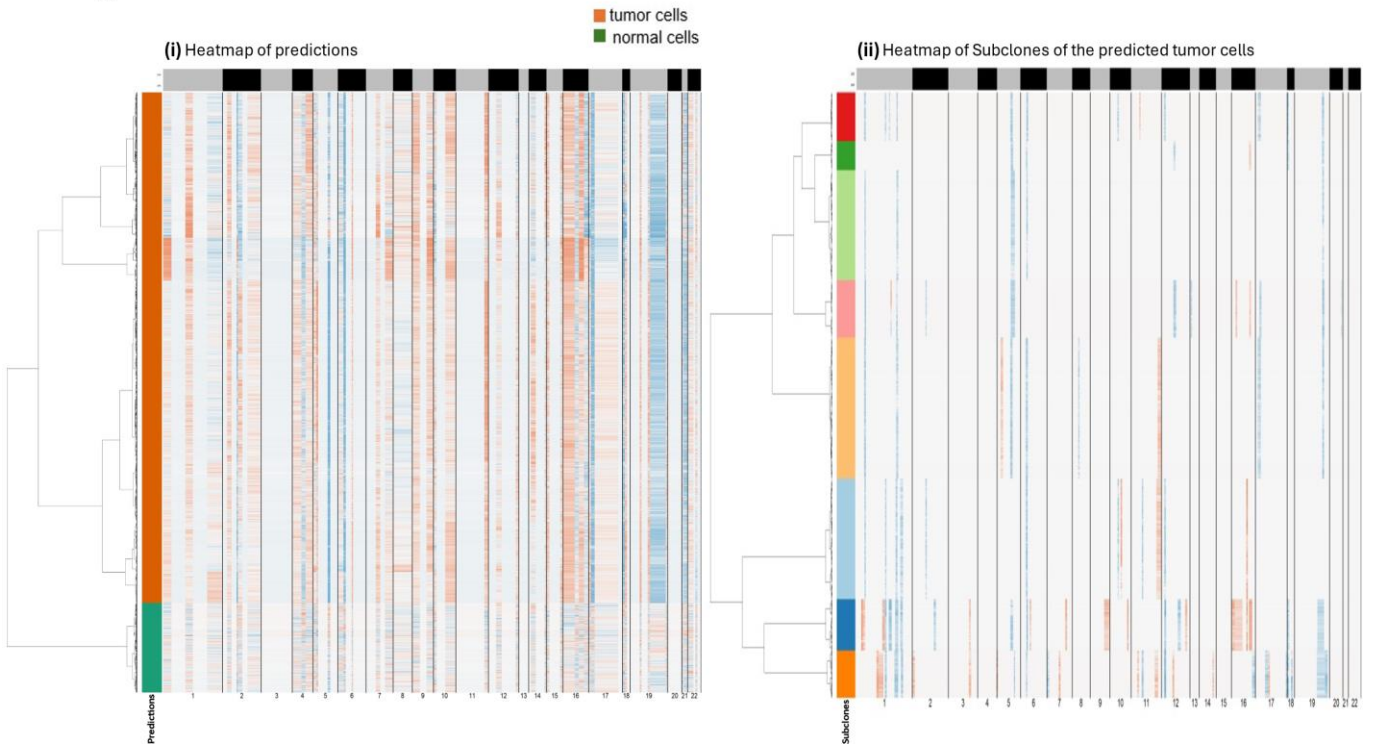

AdjNorm\_2

(g)

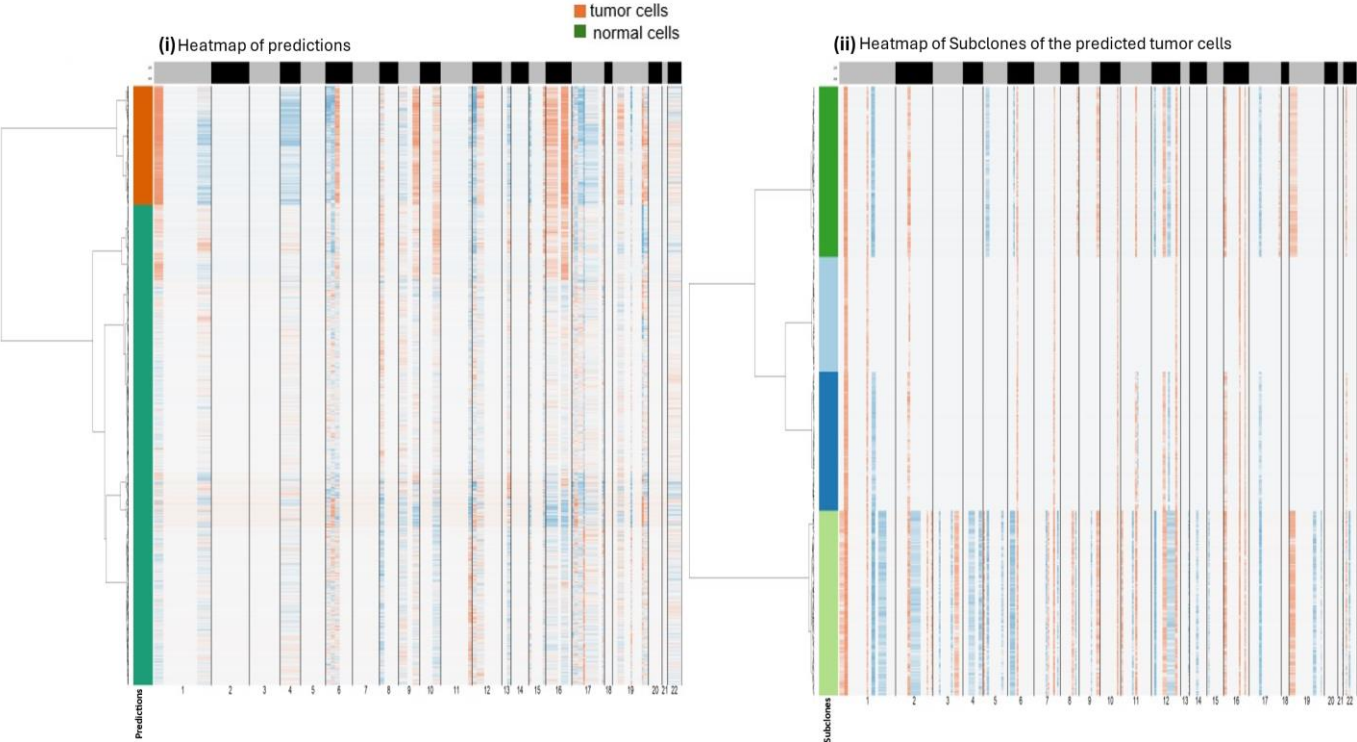

Normal\_N1

(h)

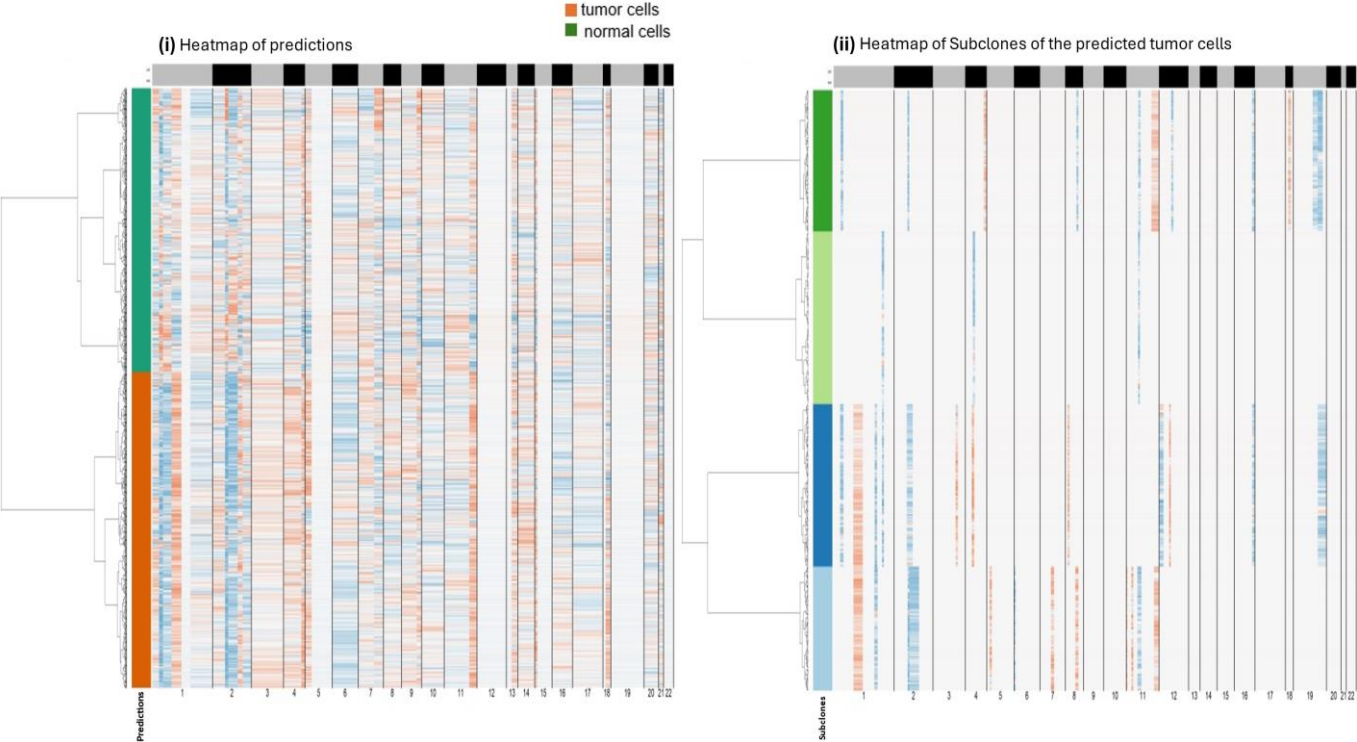



**Supplementary Table S2:** Detailed cell type annotation for each sample using SingleR.

| CELL TYPE                                                                            | PDAC_1         | PDAC_2         | PDAC_3         | PDAC_4<br>(Met.) | PDAC_5<br>(Met.) | AdjNorm_1      | AdjNorm_2      | Normal_N1      |
|--------------------------------------------------------------------------------------|----------------|----------------|----------------|------------------|------------------|----------------|----------------|----------------|
| <b>NON-IMMUNE CELLS</b>                                                              | <i>(34.8%)</i> | <i>(90.0%)</i> | <i>(93.2%)</i> | <i>(95.6%)</i>   | <i>(93.0%)</i>   | <i>(43.5%)</i> | <i>(43.8%)</i> | <i>(57.4%)</i> |
| Epithelial_cells                                                                     | 196            | 844            | 1325           | 2774             | 2303             | 705            | 653            | 388            |
| Endothelial_cells                                                                    | 10             | 12             |                | 1                | 1                | 156            | 111            | 170            |
| Fibroblasts                                                                          | 95             | 83             | 84             |                  | 1                | 31             | 8              | 84             |
| Tissue_stem_cells                                                                    | 23             | 27             | 9              |                  |                  | 529            | 62             | 127            |
| Smooth_muscle_cells                                                                  | 2              | 20             | 2              |                  |                  | 23             | 9              | 83             |
| Chondrocytes                                                                         | 33             | 26             | 41             |                  |                  | 23             | 13             | 31             |
| Common Myeloid Progenitor (CMP) cells                                                | 1              | 3              |                |                  |                  | 127            | 73             |                |
| Erythroblast                                                                         | 3              |                |                |                  |                  | 90             | 25             |                |
| Granulocyte/Monocyte Progenitor (GMP) cells                                          | 1              |                | 2              |                  |                  | 16             | 27             | 2              |
| Neurons                                                                              | 1              | 8              |                |                  |                  | 36             | 18             | 7              |
| Pre-B_cell_CD34-                                                                     |                |                |                |                  | 5                | 27             | 28             | 1              |
| Embryonic_stem_cells                                                                 |                |                |                |                  |                  | 8              | 11             | 4              |
| Bone Marrow & Progenitor (BM & Prog.) cells                                          |                |                |                |                  |                  | 2              | 6              |                |
| Gametocytes                                                                          |                |                |                |                  |                  | 3              | 2              | 1              |
| Hepatocytes                                                                          |                |                |                | 1                | 1                | 205            | 370            | 125            |
| Mesenchymal stem cells (MSCs)                                                        |                | 1              |                |                  |                  | 1              |                |                |
| induced Pluripotent Stem (iPS) cells                                                 |                |                |                | 2                |                  | 30             | 64             | 7              |
| Bone Marrow (BM) Cells                                                               | 16             |                |                |                  |                  | 87             | 14             |                |
| Keratinocytes                                                                        |                |                |                |                  |                  | 3              | 1              |                |
| Osteoblasts                                                                          |                |                |                |                  |                  | 2              | 1              | 6              |
| Megakaryocyte/Erythroid Progenitor (MEP) cells                                       |                |                |                |                  |                  | 9              | 12             |                |
| Platelets                                                                            |                |                |                |                  |                  | 9              | 14             |                |
| HSC_CD34+ (CD34 positive-Hematopoietic stem cells)                                   |                |                |                |                  |                  | 24             | 47             | 29             |
| Myelocyte                                                                            |                |                |                |                  |                  | 8              | 1              |                |
| Neuroepithelial_cell                                                                 | 1              | 1              |                |                  |                  | 6              | 3              |                |
| Astrocyte                                                                            |                |                |                |                  |                  | 7              | 15             |                |
| HSC_-G-CSF (Granulocyte colony-stimulating factor positive-Hematopoietic stem cells) |                |                |                |                  |                  | 12             | 6              |                |
| Pro-B_cell_CD34+                                                                     |                |                |                |                  |                  | 9              | 20             |                |
| Pro-Myelocyte                                                                        |                |                |                |                  |                  | 11             | 2              |                |
| <b>IMMUNE CELLS</b>                                                                  | <i>(65.2%)</i> | <i>(10.0%)</i> | <i>(6.8%)</i>  | <i>(4.4%)</i>    | <i>(7.0%)</i>    | <i>(55.7%)</i> | <i>(55.0%)</i> | <i>(42.6%)</i> |
| Macrophage                                                                           | 398            | 53             | 51             | 57               | 43               | 638            | 269            | 520            |
| Neutrophils                                                                          |                |                |                |                  |                  | 532            | 59             | 16             |
| Natural killer (NK) cells                                                            | 6              | 1              | 9              | 28               | 19               | 251            | 183            | 23             |
| Monocyte                                                                             | 192            | 28             | 34             | 31               | 51               | 256            | 632            | 88             |
| B_cell/lymphocyte                                                                    | 8              | 3              | 1              | 1                | 1                | 88             | 38             |                |
| Dendritic cells (DCs)                                                                | 23             | 26             | 11             | 7                | 1                | 53             | 70             | 118            |
| T_cells/lyphocytes                                                                   | 89             | 3              | 1              | 3                | 58               | 952            | 723            | 25             |
| <b>Total Number of Cells</b>                                                         | <b>1098</b>    | <b>1139</b>    | <b>1570</b>    | <b>2905</b>      | <b>2484</b>      | <b>4969</b>    | <b>3590</b>    | <b>1855</b>    |

**Supplementary Tables S3-S5:** Detailed calculations of the performance of InferCNV (**Supplementary Table S3**), CopyKAT (**Supplementary Table S4**) and SCEVAN (**Supplementary Table S5**) using the cells identified by markers as reference tumor cells. For each sample: True positives (**TP**) represent the overlap between the tumor cells predicted by each tool and the cells identified by markers, False Positives (**FP**) are those predicted by the tools but not by markers, False negatives (**FN**) are cells not predicted as tumorous by each tool among those identified as cancer cells by markers, and true negatives (**TN**) are those not predicted as tumorous by both markers and the CNV inference tools.

*Supplementary Table S3: InferCNV*

| Sample       | Reference tumor cell number | InferCNV |     |      |     |             |             |
|--------------|-----------------------------|----------|-----|------|-----|-------------|-------------|
|              |                             | TP       | FP  | TN   | FN  | Sensitivity | Specificity |
| PDAC_1       | 146                         | 145      | 834 | 118  | 1   | 0.99        | 0.12        |
| PDAC_2       | 737                         | 737      | 295 | 107  | 0   | 1           | 0.27        |
| PDAC_3       | 1184                        | 1180     | 290 | 96   | 4   | 1           | 0.25        |
| PDAC_4 (Met) | 2642                        | 2640     | 159 | 104  | 2   | 1           | 0.4         |
| PDAC_5 (Met) | 2191                        | 1881     | 86  | 207  | 310 | 0.86        | 0.71        |
| AdjNorm_1    | 271                         | 43       | 962 | 3736 | 228 | 0.16        | 0.8         |
| AdjNorm_2    | 50                          | 3        | 34  | 3506 | 47  | 0.06        | 0.99        |
| Normal_N1    | 0                           |          | 0   | 1855 | 0   |             | 1           |
|              |                             |          |     |      |     | Mean        |             |
|              |                             |          |     |      |     | 0.72        | 0.57        |

*Supplementary Table S4: CopyKAT*

| Sample       | Reference tumor cell number | CopyKAT |      |      |      |             |             |
|--------------|-----------------------------|---------|------|------|------|-------------|-------------|
|              |                             | TP      | FP   | TN   | FN   | Sensitivity | Specificity |
| PDAC_1       | 146                         | 15      | 884  | 68   | 131  | 0.1         | 0.07        |
| PDAC_2       | 737                         | 734     | 110  | 292  | 3    | 1           | 0.73        |
| PDAC_3       | 1184                        | 719     | 347  | 39   | 465  | 0.61        | 0.1         |
| PDAC_4 (Met) | 2642                        | 1044    | 114  | 149  | 1598 | 0.4         | 0.57        |
| PDAC_5 (Met) | 2191                        | 952     | 67   | 226  | 1239 | 0.43        | 0.77        |
| AdjNorm_1    | 271                         | 32      | 2249 | 2449 | 239  | 0.12        | 0.52        |
| AdjNorm_2    | 50                          | 3       | 450  | 3090 | 47   | 0.06        | 0.87        |
| Normal_N1    | 0                           | 0       | 359  | 1496 | 0    |             | 0.81        |
|              |                             |         |      |      |      | Mean        |             |
|              |                             |         |      |      |      | 0.39        | 0.55        |



*Supplementary Table S5: SCEVAN*

| Sample       | Reference tumor cell number | SCEVAN |      |      |      |             |             |
|--------------|-----------------------------|--------|------|------|------|-------------|-------------|
|              |                             | TP     | FP   | TN   | FN   | Sensitivity | Specificity |
| PDAC_1       | 146                         | 125    | 51   | 901  | 21   | 0.86        | 0.95        |
| PDAC_2       | 737                         | 733    | 113  | 289  | 4    | 0.99        | 0.72        |
| PDAC_3       | 1184                        | 540    | 64   | 322  | 644  | 0.46        | 0.83        |
| PDAC_4 (Met) | 2642                        | 731    | 105  | 158  | 1911 | 0.28        | 0.6         |
| PDAC_5 (Met) | 2191                        | 811    | 56   | 237  | 1380 | 0.37        | 0.81        |
| AdjNorm_1    | 271                         | 246    | 2572 | 2126 | 25   | 0.91        | 0.45        |
| AdjNorm_2    | 50                          | 3      | 422  | 3118 | 47   | 0.06        | 0.88        |
| Normal_N1    | 0                           | 0      | 518  | 1337 | 0    |             | 0.72        |
|              |                             |        |      |      |      | Mean        |             |
|              |                             |        |      |      |      | 0.56        | 0.75        |
