# Supplementary material for: A Comparison of Tools That Identify Tumor Cells by Inferring CNVs from Single-Cell Experiments in Pancreatic Ductal Adenocarcinoma
Source: Preprints.org preprint supplement (doi:10.20944/preprints202407.2037.v1), 2024-07-25
Supplement: Supplementary file 1 [file supplementary]

## Sheet: S1
SUPPLEMENTARY TABLE S1: PANCREATIC DUCTAL ADENOCARCINOMA CELL MARKERS FROM LITERATURE SEARCH
CELL TYPE	ALTERATION OR ENRICHMENT	MARKERS		SAMPLE INFORMATION			REFERENCE
				PATIENT TISSUE	CELL LINES	METHODS	AUTHORS	Pubmed id. (PMID)
Pancreatic Cancer stem cells	PDAC stem cells were isolated from human biopsies by flow cytometry	1	CD44, CD24, ESA (FLOT2)	10 xenografts (in NOD/SCID mice) originating from 8 primary and 2 metastatic human PDAC; 3 normal pancreas and 3 separate pancreatic cancer xenografts samples for validation		IHC, qRT-PCR	Li, Chenwei et al. (2007)	17283135
		2	CD133 (PROM1)	7 Tissue samples derived from human PDAC patients, and Xenografts (in NMRI-nu/nu mice) originating from Human cell line (COLO 357) of metastatic PDAC		FACS, IHC	Hermann PC, Huber SL, Herrler T, et al. (2007)	18371365
Metastatic pancreatic Cancer stem cells		3	CD133 (PROM1) + CXCR4
Pancreatic Ductal Adenocarcinoma (PDAC)	Overexpressed in surgically resected PDAC tissue samples	4	TSPAN1,TMPRSS4, SDR16C5, CTSE	9 datasets (E-MEXP-2780, GSE15471, GSE16515, GSE32688, GSE71989, GSE106189, GSE62452, E-MTAB-6134, GSE62165) were combined to develop diagnostic models with a total of 818 samples. GSE32676 dataset with 32 samples was chosen to externally validate the model's performance.		microarray, RNA-seq, RT-PCR, IHC	Ye, Hua et al. (2021)	33815409
		5	LIPH	177 PC cases from The Cancer Genome Atlas (TCGA) database. And GSE28735 dataset (45 pairs of adjacent non-tumor tissues and pancreatic tumor) for validation.		RNA-seq, microarray	Zhuang, Hongkai et al. (2022)	34279685
		6	Plastin-3 (PLS3)	113 PDAC and 70 pancreas samples (GEO data: GSE16515, GSE15471, GSE32676, GSE71989), Validation using TCGA and GTEx data: 178 PDAC and 171 normal pancreas samples		microarray, qRT-PCR	Xiong, Fei et al. (2021)	34348730
		7	LINC01133	GEO data (GSE32676 and GSE16515)	PC cell lines W1990, Capan1, AsPc1, PANC-1, BxPC-3, and normal human pancreatic ductal cell line HPDE	microarray	Weng, Yuan-Chi et al. (2019)	30580676
	Overexpressed in PDAC tissue specimens	8	MAL2	TCGA and GTEx data, non-tumor (n = 21) and PDAC (n = 35) pancreatic tissue specimens	AsPC-1, HPDE6-C7, BxPC-3, PANC-1, MIA PaCa-2, SW1990	qRT-PCR, Tissue microarray, IHC	Zhang, Bin et al. (2021)	33780861
	Overexpressed in PDAC patients	9	V-set and immunoglobulin domain containing 2 (VSIG2)	62 pancreatic cancer patients, GSE16515,GSE15471,GSE22780 and TCGA	Human pancreatic cancer cell lines PANC-1, MIA PaCa-2, SW 1990, AsPC-1, BxPC-3 and normal human pancreatic ductal epithelial (HPDE)	microarrays, qRT-PCR	Xu, Jichuan et al. (2023)	37626304
		10	Plakophilin 3 (PKP3)	178 PDAC and 171 healthy pancreatic tissues from TCGA and GTEx databases, GEO data and 85 PC tissues and 45 healthy tissues for validation	PC cell lines SPC-1, SW1990, BXPC3, PANC-1 and human pancreatic cell line (HPNE)	RNA-seq,qRT-PCR,IHC,microarray	Du, Yan et al. (2023)	37760912
		11	Anterior gradient 2 (AGR2)	Matched PDAC/normal tissue micro array (n = 57) and pancreatic intraepithelial neoplasia (PanIN) slides (n = 10) 5 normal pancreas, 6 PDAC, and 5 chronic pancreatitis tissues for validation	BxPC3, MiaPaCa-2, CFPAC-1, HPAC, Panc-1, Aspc-1, SU.86.86, MPanc-96	microarray, IHC, Q-RT-PCR	Ramachandran, Vijaya et al. (2008)	18829536
		12	TSPAN8, SOX9, LCN2 , KRT19, CEACAM1, CEACAM5, CEACAM6, KRT7, SLPI, MUC1, FXYD3	24 PDAC and 11 control (3 non-pancreatic tumor and 8 cases of non-malignant pancreatic tumor patients) surgically resected patient samples		scRNA-seq. IHC	Peng J, Sun BF, Chen CY, et al. (2019)	31273297
	Upregulated in PDAC tissue samples	13	RAB3A, RAB26, RAB25, RAB21, RAB22A	PDAC tissues (n = 178), normal tissues (n = 4), TCGA dataset: 20 paired PC samples and adjacent normal tissues for validation		RNA-seq, IHC	Anand, Shashi et al. (2020)	32759795
		14	FXYD3	PDAC (n = 31), Chronic Pancreatitis (n = 22) and Normal pancreatic(n = 20) tissue samples	Aspc-1, BxPc-3, Capan-1, Colo-357, SU86.86, T3M4, MiaPaCa-2, Panc-1	microarray, qRT-PCR, IHC	Kayed, Hany et al. (2006)	16003754
	Upregulated in PDAC tissue specimens	15	SYT8	PDAC (n=179) tissues and (n=171) non-tumor tissues	PC cell lines AsPC-1, BxPC-3, Mia PaCa-2, Panc-1 and normal HPDE	GEPIA web tool, qRT-PCR,IHC	Fu, Zhiping et al. (2021)	34907162
		16	ASPM, CCNB1, CDK1, CENPK, DDX60, MELK, MX1, OAS1, OAS3, PTTG1, TOP2A	GEO data: GSE15471; 36 matching pairs of PDAC and adjacent non-tumor tissues. GSE32688; 25PDAC and 7 normal pancreas tissues. GSE46234; 2 PDAC and 4 adjacent non-tumor tissues. GSE46385; 2 PDAC and 3 adjacent non-tumor tissues		microarrays	Zeng, Y., & Fan, R. (2022)	36167975
	Overexpressed in PDAC tissue samples	17	ANLN, SLC2A1, CXCL5, KRT7, MKI67, TOP2A	Databases:Cohort 1 (N = 69) is microarray data of pancreatic cancer patients from GSE62452 in GEO database. Cohort 2 (N = 179) is sequencing data of pancreatic cancer patients from TCGA database.Cohort 3 (N = 50) and cohort 4 (N = 200) were tumor samples used for validation.		microarray, scRNA-seq	Pei, Y. F., Yin, X. M., & Liu, X. Q. (2018)	29045811
PDAC progression		18	S100 calcium binding protein A14 (S100A14)	10 pairs of PDAC tumor tissues and surrounding normal tissues. 175 PDAC and 27 non-tumor tissues for validation.	Capan2, Panc1, CFPAC1, SW1990, 293T	microarray, qRT-PCR, IHC	Zhu H, Gao W, Li X, et al. (2021)	33579599
		19	CAPN8	179 tumor tissues, 167 normal control tissues and 4 para-carcinoma tissues from TCGA and Genotype-Tissue Expression Project (GTEx) databases	PC cell lines SW1990, CFPAC-1, PANC-1, ASPC1, MIA-Paca2, BXPC3, and normal pancreatic ductal epithelial cell line (HPDE6-C7)	RNA-seq	Song N, Cui K, Zeng L, et al. (2024)	38697284
PDAC Epithelial Tumor Cells (ETC)		20	AGR2, AGR3, AMN, ANXA10, ARL14, C1orf106, CAPN8, CCDC64B, CDH1, CEACAM6, CLDN18, CLDN7, CTSE, CXADR, CYP3A5, EDN1, ELF3, EPCAM, EPS8L3, ERBB3, FXYD3, GPX2, KRTCAP3, LAD1, LGALS4, LINC01133, LIPH, LSR, MAL2, MSLN, MYH14, OCLN, PKP3, PLA2G10, PLS1, PRSS8, RAB25, S100A14, SDCBP2, SFTA2, SLC44A4, SMIM22, SYT8, TESC, TMC4, TMC5, TMPRSS4, TSPAN1, TSPAN8, VSIG2	10 primary and 6 metastatic PDAC		scRNA-seq	Lin W, Noel P, Borazanci EH, et al. (2020)	32988401
PDAC EMT (Mesenchymal Tumor Cells)		21	AC005789.11, ANGPTL4, APCDD1L, CAPRIN2, CAV1, CHST3, COL13A1, COL7A1, CYP27C1, DCBLD2, DKK3, EID2B, FSTL3, HMGA2, IGFBP6, ITGA10, ITGA5, KLHL4, KRT14, KRT81, L1CAM, LOX, LYPD3, MFI2, MGC4294, MT1A, MT1M, NFE4, NPW, NT5E, NTSR1, PAEP, PAF1, PAK4, PDLIM4, PLAT, PLCXD3, PLEKHG2, RASSF8-AS1, RFX8, RP11-417E7.1, SERPINE1, SERPINE2, SNAI2, SRPX, SYT12, TGM2, TIMM50, TMEM158, TNC
		22	SOX9	Healthy human pancreatic tissue, and in PanIN and PDAC	Panc-1, RWP-1, IMIMPC-1, IMIMPC-2, BxPC-3, SKPC-1, SKPC-3, MiaPaca-2, Hs766-T	microarray, IHC	Carrasco-Garcia, Estefania et al. (2022)	35205666
Metastatic PDAC		23	TSPAN8 and SOX9	87 PDAC patients:tumor tissues (TTs) and normal adjacent tissues (NATs), TCGA and GTEx databases for validation studies. 40 PDAC specimens for TSPAN8 and SOX9 correlation studies	Capan-2, PANC-1, HEK293T, HCC827	microarray, IHC	Li J, Chen X, Zhu L, et al. (2021)	34163029
